# Supplementary material for: Programming as a soft skill for project managers: How to have a computer take over some of your work
Source: Copernicus journal article supplement (doi:10.5194/adgeo-45-295-2018), 2018-10-18
Supplement: Supplementary file 1 [file adgeo-45-295-2018-supplement.zip]

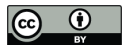

## *Supplement of*

# **Programming as a soft skill for project managers: How to have a computer take over some of your work**

**Nikolay V. Koldunov and Luisa Cristini**

*Correspondence to:* Nikolay Koldunov ([nikolay.koldunov@awi.de](mailto:nikolay.koldunov@awi.de))

- [adgeo-45-295-2018-supplement-title-page.pdf](#)
- [Programming\\_for\\_project\\_managers-master](#)
  - [EU-PYTHON.docx](#)
  - [EU\\_HORIZON2020.ipynb](#)
  - [EU\\_HORIZON202\\_merge\\_tables.ipynb](#)
  - [HORIZON2020\\_milestones.docx](#)
  - [National\\_project.ipynb](#)
  - [Python.docx](#)
  - [README.md](#)
  - [environment.yml](#)
  - [names.txt](#)
  - [names.xlsx](#)
  - [numpers.txt](#)
  - [python\\_examples.ipynb](#)

The copyright of individual parts of the supplement might differ from the CC BY 4.0 License.
